# Supplementary material
Source: Springer Nature journal article supplement (https://www.springermedizin.de/resource/supplementary/12890_2013_655_MOESM1_ESM.pdf/9505596)

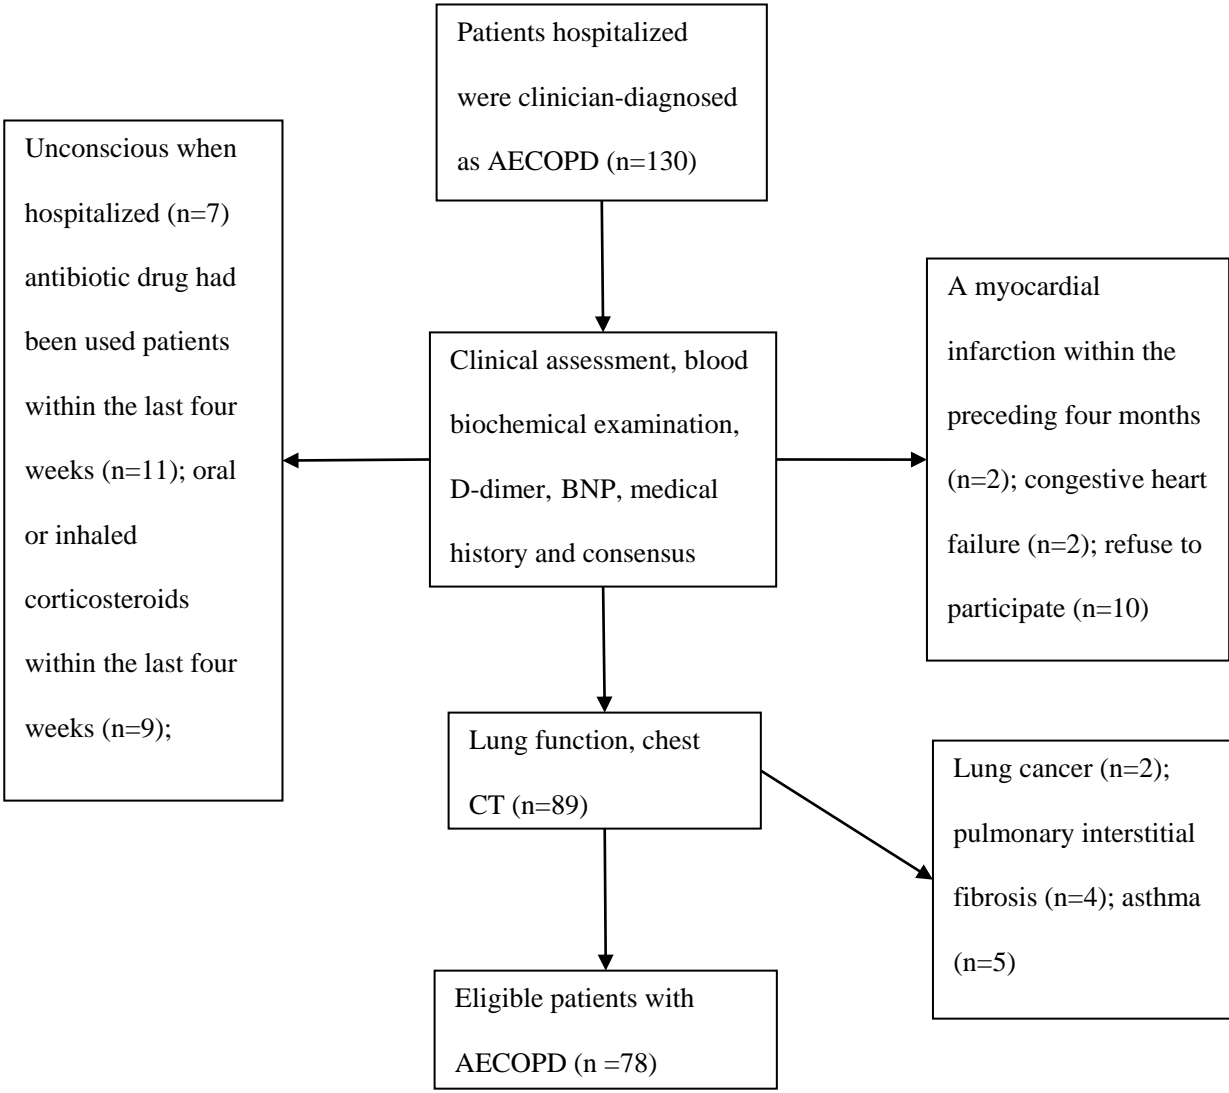

Supplement: MOESM1 [file 9505596]
